# Supplementary material for: Molten salt-assisted synthesis of a nitrogen-doped biochar catalyst at low temperature for enhanced degradation of acetaminophen
Source: Royal Society of Chemistry journal article supplement (doi:10.1039/d4ta07221a), 2024-12-03
Supplement: d4ta07221a1.pdf [file d4ta07221a1.pdf]

1

## Supplementary Materials

2

### Molten salt-assisted synthesis of nitrogen-doped biochar catalyst at low 3 temperature for enhanced degradation of acetaminophen

4

Gongyong Feng <sup>a</sup>, Wenhao Li <sup>a</sup>, Haibo Ye<sup>a</sup>, Teng Wang <sup>a,c</sup>, Yang Liu <sup>a,c</sup>, Binghua Jing <sup>c</sup>, Chunyang Nie <sup>b\*</sup>,

5

Didi Li <sup>a\*</sup>, Zhimin Ao <sup>c\*</sup>

6

[a] Guangdong Key Laboratory of Environmental Catalysis and Health Risk Control, Guangzhou Key Laboratory Environmental  
7 Catalysis and Pollution Control, Institute of Environmental Health and Pollution Control, School of Environmental Science and  
8 Engineering, Guangdong University of Technology, Guangzhou 510006, China.

9

[b] Research Institute of Interdisciplinary Sciences (RISE) and School of Materials Science & Engineering, Dongguan University of  
10 Technology, Dongguan 523808, China.

11

[c] Advanced Interdisciplinary Institute of Environment and Ecology, Beijing Normal University, Zhuhai 519087, China.

12

\*Corresponding author's email address: [Zhimin.ao@bnu.edu.cn](mailto:Zhimin.ao@bnu.edu.cn) (ZA), [niechunyang@dgut.edu.cn](mailto:niechunyang@dgut.edu.cn) (CN), [ddli@gdut.edu.cn](mailto:ddli@gdut.edu.cn) (DL)

13

**Pages (15)**

14

**Texts (4)**

15

● Text S1. The characterization methods of as-prepared catalysts.

16

● Text S2. Instruments and Methods for EPR Testing.

17

● Text S3. The model and detailed content of the electrochemical analysis instruments.

18

● Text S4. The methods of material recycling.

19

**Tables (4)**

20

● Table S1. Other catalysts reported in literatures.

21

● Table S2. Percentages of different forms of nitrogen in fresh and used AL@N and AL@NX.

22

● Table S3. Identified degradation intermediates of APAP in AL@NX/PMS system.

23

● Table S4. Water quality indexes of actual water.

24

**Figures (11)**

25

● Fig. S1. Pore distribution maps of four catalysts.

26

● Fig. S2. Comparison of adsorption properties of four catalysts.

27

● Fig. S3. Cyclic degradation experiments by AL@NX/PMS system.

28

● Fig. S4. SEM images of used AL@NX.

29

● Fig. S5. N<sub>2</sub> adsorption isotherm of fresh, used and recovered AL@NX.

30

● Fig. S6. Degradation experiments on different pollutants.

31

● Fig. S7. APAP removal performance of AL@NX/PMS system in D<sub>2</sub>O and regular water.

32

● Fig. S8. Degradation of APAP in the AL@NX/PMS system under air and N<sub>2</sub>-saturated conditions.

33

● Fig. S9. Degradation of APAP in the AL@NX/PMS system under photoirradiation and dark conditions.

34

35 **Text S1.** The morphology and microstructure of the samples were observed using a scanning electron microscope  
36 (SEM). The pore structure and Brunauer-Emmett-Teller specific surface area (SSA) of biochar were obtained by N<sub>2</sub>  
37 adsorption–desorption isotherms at 77 K (ASAP 2460). The crystal structure of AL@NX was analyzed using an X-ray  
38 diffractometer (model Bruker AXS D8 Advance) equipped with a high-intensity monochromatic Cu-K $\alpha$  light source  
39 with  $\lambda = 1.5218 \text{ \AA}$ , and the  $2\theta$  angle was between  $10^\circ$  and  $90^\circ$ . The interaction between AL@NX and PMS and the  
40 carbon structure of AL@NX were monitored by Raman spectroscopy (Horiba JobinYvon). The surface elemental  
41 composition of biochar was analyzed using X-ray photoelectron spectroscopy (XPS) (Escalab 250Xi, Thermo Fisher).  
42 Binding energy of C1s at 284.8 eV was used for correction. Fourier Transform Infrared (Nicolet iS10, Thermo Fisher)  
43 was used to observe the functional groups of AL@NX.

44 **Text S2.** The reactive species produced in the AL@NX/PMS system were analyzed using the Electron paramagnetic  
45 resonance (EPR, Bruker EMXPlus-10/12) spectrometer. DMPO and TEMP were employed as spin-trapping reagents  
46 for free radicals and singlet oxygen, respectively. The experimental parameters of the spectrometer included a  
47 resonant frequency of 9.85 GHz, a microwave power of 20.00 mW, a modulation frequency of 100 kHz, a  
48 modulation amplitude of 1.00 G, a sweep width of 100 G, a time constant of 0.01 ms, and a sweep time of 40.00 s.

49 **Text S3.** Electrochemical analysis was conducted using a three-electrode system on an electrochemical workstation  
50 (CHI 650e, Chenhua, China). The experiment was carried out using the timing current method with the study  
51 sample as the working electrode, platinum electrode as the counter electrode, and Ag/AgCl electrode as the  
52 reference electrode in a 0.1M sodium sulfate solution. A bias voltage of +0.5V was applied during the experiment.  
53 Initially, at 200s, 2mM of PMS was added to the electrolyte, and the subsequent current change was recorded.  
54 Subsequently, at 400s, the pollutant APAP was introduced into the electrolyte at a concentration of 50mg/L, and  
55 the resulting current change was monitored at 600s. The LSV test began by utilizing a platinum electrode matched  
56 with an Ag/AgCl electrode in a 0.1M sodium sulfate solution as the electrolyte. The voltage window ranged from  
57 0V to +1.6V, with a scan rate of 20mV/s. Following the addition of the corresponding reagent to the electrolyte,  
58 the test was initiated. Four different systems were tested: the first with pure electrolyte, the second with  
59 electrolyte containing only 2mM PMS, the third containing only 50mg/L APAP, and the fourth with electrolyte  
60 containing both 2mM PMS and 50mg/L APAP.

61 **Text S4.** To assess the cycling stability of the materials, four degradation experiments were conducted on the same  
62 batch of materials. After each experiment, the samples were filtered, washed several times with ultrapure water  
63 and anhydrous ethanol, dried in an oven at 80°C for 12 hours, and then subjected to catalyst recovery by placing  
64 them in a tubular furnace with an argon atmosphere (40 ml/min), a pyrolysis temperature of 350°C, and a retention  
65 time of 1 hour.

**Table S1.** Other catalysts reported in literatures. <sup>1-4</sup>

| Catalyst type                      | Catalyst dosage (g L <sup>-1</sup> ) | Concentration of | PMS dosage | Degradation | Ref.             |
|------------------------------------|--------------------------------------|------------------|------------|-------------|------------------|
|                                    |                                      | APAP (ppm)       | (mM)       | time (min)  |                  |
| CM                                 | 0.1                                  | 10               | 0.662      | 15          | [1]              |
| CoFe-C <sub>3</sub> N <sub>4</sub> | 0.2                                  | 10               | 0.5        | 20          | [2]              |
| Fe-N-C                             | 0.1                                  | 10               | 0.5        | 25          | [3]              |
| MX@N-800                           | 0.1                                  | 50               | 0.5        | 15          | [4]              |
| <b>AL@NX</b>                       | <b>0.1</b>                           | <b>50</b>        | <b>0.5</b> | <b>5</b>    | <b>This work</b> |

67

68

69

70

71

72

73

74

75

76

77

78

**Table S2.** Percentages of different forms of nitrogen in fresh and used AL@N and AL@NX.

| Samples   | pyridinic N (%) | pyrrolic N (%) | graphitic N (%) |
|-----------|-----------------|----------------|-----------------|
| AL@N      | 51.54           | 42.77          | 5.69            |
| AL@NX     | 54.05           | 36.58          | 9.37            |
| AL@NX-2nd | 40.25           | 44.55          | 15.19           |
| AL@NX-3rd | 32.97           | 52.67          | 14.36           |

79

80

81

82

83

84

85

86

87

88

89

90

91

**Table S3.** Identified degradation intermediates of APAP in AL@NX/PMS system.

| Formula                                                       | Retention time | Theoretical m/z<br>[M-H] <sup>-</sup> | Experimental m/z<br>[M-H] <sup>-</sup> | DE <sup>1</sup><br>(ppm) | Structural formula                                                                    |
|---------------------------------------------------------------|----------------|---------------------------------------|----------------------------------------|--------------------------|---------------------------------------------------------------------------------------|
| C <sub>8</sub> H <sub>9</sub> NO <sub>2</sub>                 | 3.395          | 151.0632                              | 152.0705                               | -0.94                    | 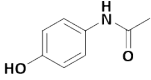   |
| C <sub>3</sub> H <sub>7</sub> NO                              | 1.26           | 73.0527                               | 74.0600                                | -0.9                     |    |
| C <sub>3</sub> H <sub>6</sub> O <sub>3</sub>                  | 0.533          | 126.0316                              | 127.0389                               | -0.78                    |    |
| C <sub>8</sub> H <sub>9</sub> NO <sub>3</sub>                 | 1.809          | 167.0581                              | 168.0654                               | -1                       |    |
| C <sub>6</sub> H <sub>7</sub> NO                              | 3.513          | 109.0527                              | 110.0600                               | -0.6                     |    |
| C <sub>8</sub> H <sub>9</sub> NO <sub>5</sub>                 | 2.861          | 199.0479                              | 200.0552                               | -0.87                    |    |
| C <sub>16</sub> H <sub>16</sub> N <sub>2</sub> O <sub>4</sub> | 8.601          | 300.1105                              | 301.1177                               | -1.57                    |  |
| C <sub>6</sub> H <sub>7</sub> NO <sub>2</sub>                 | 0.565          | 125.0476                              | 126.0548                               | -0.92                    |  |
| C <sub>2</sub> H <sub>5</sub> NO                              | 0.945          | 59.0373                               | 60.0446                                | 3.05                     |  |
| C <sub>5</sub> H <sub>10</sub> O <sub>2</sub>                 | 10.833         | 102.0680                              | 103.0752                               | -1.13                    |  |

93 DE<sup>1</sup> represented the relative error between theoretical m/z value and experimental m/z value.

94

95

96

97

98

99

100

101

**Table S4.** Water quality indexes of actual water.

| pH   | TOC    | COD    | Conductivity | HCO <sub>3</sub> <sup>-</sup> | Cl <sup>-</sup> | reactive<br>phosphate | HA     |
|------|--------|--------|--------------|-------------------------------|-----------------|-----------------------|--------|
|      | (mg/L) | (mg/L) | (μS/cm)      | (mg/L)                        | (mg/L)          | (mg/L)                | (mg/L) |
| 7.57 | 19.39  | 1.92   | 15770        | 60.05                         | 37.66           | 0.046                 | 10.43  |

102

103

104

105

106

107

108

109

110

111

112

113

114

115

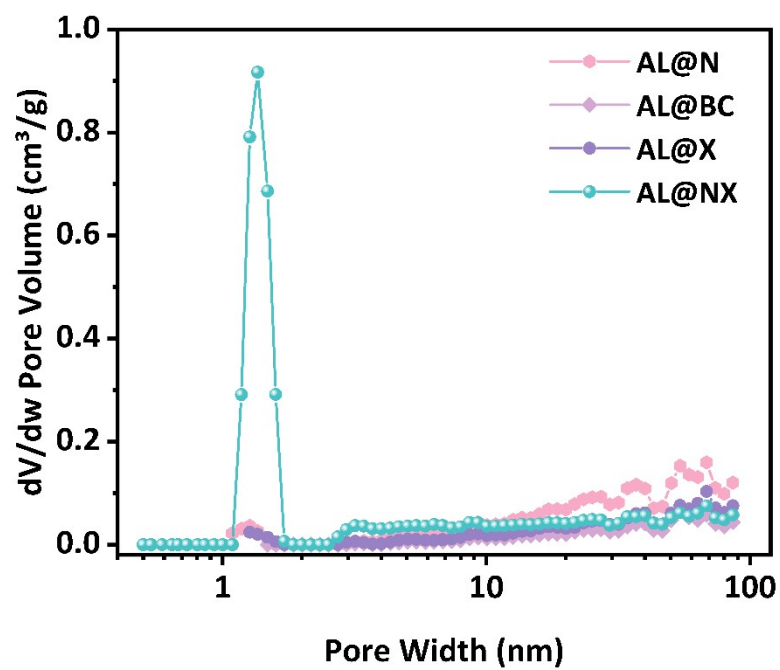

Fig. S1. Pore distribution maps of four catalysts.

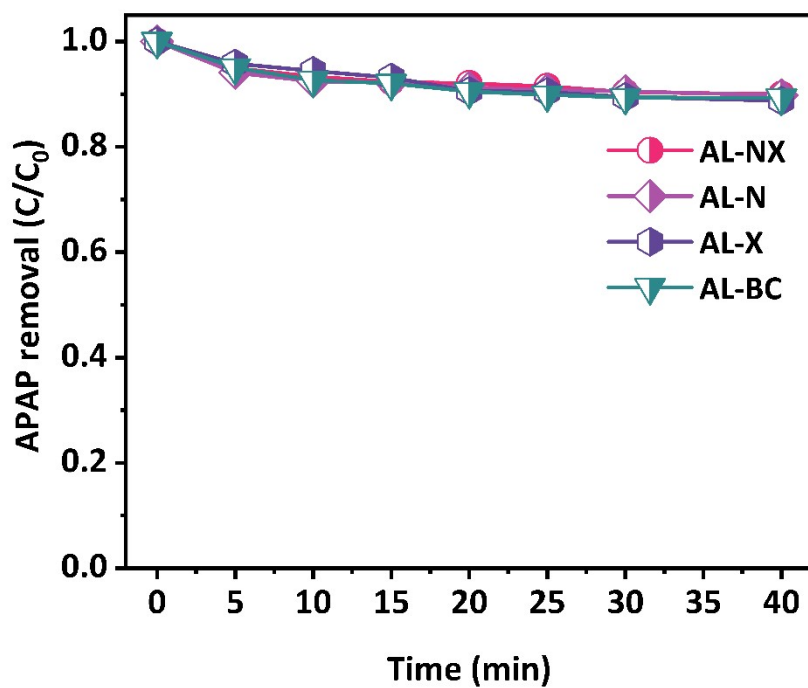

**Fig. S2.** Comparison of adsorption properties of four catalysts. Conditions: [catalyst]<sub>0</sub> = 0.1 g L<sup>-1</sup>, [APAP]<sub>0</sub> = 50 mg L<sup>-1</sup>, [PMS]<sub>0</sub> = 1 mM, Temperature = 25 °C.



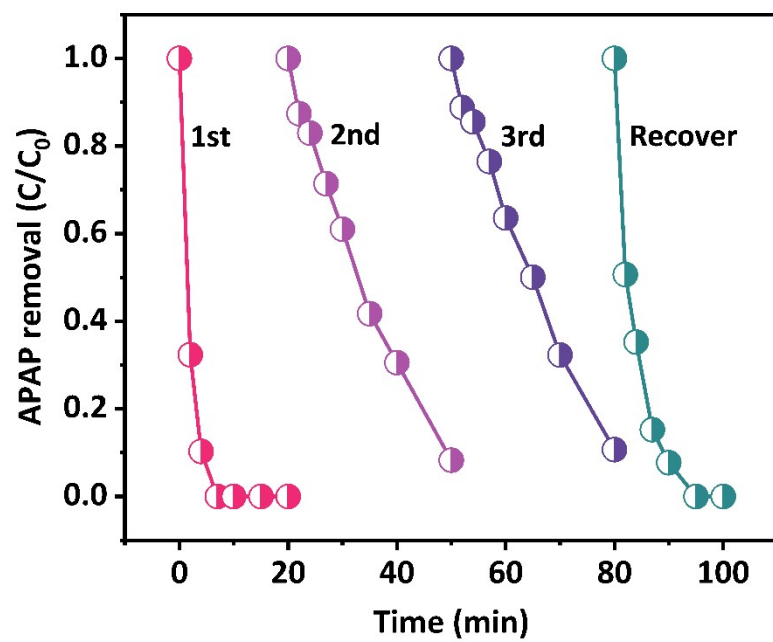

**Fig. S3.** Cyclic degradation experiments by AL@NX/PMS system. Conditions: [catalyst]<sub>0</sub> = 0.1 g L<sup>-1</sup>, [APAP]<sub>0</sub> = 50 mg L<sup>-1</sup>, [PMS]<sub>0</sub> = 1 mM, Temperature = 25 °C.

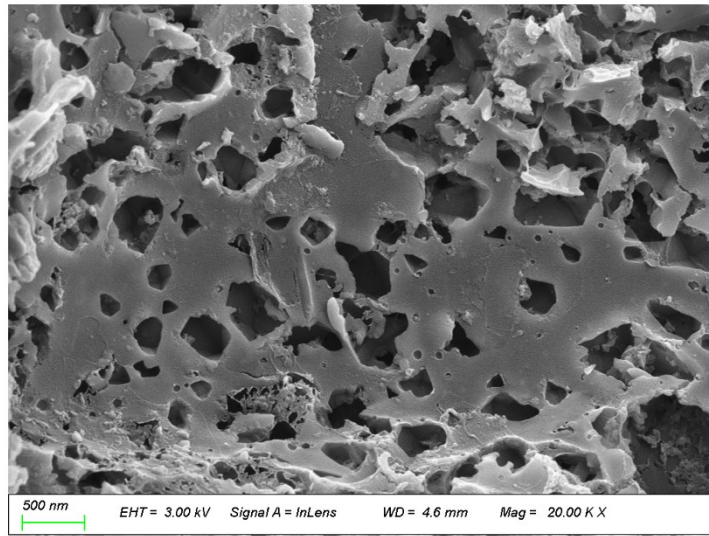

**Fig. S4.** SEM images of AL@NX-2nd.

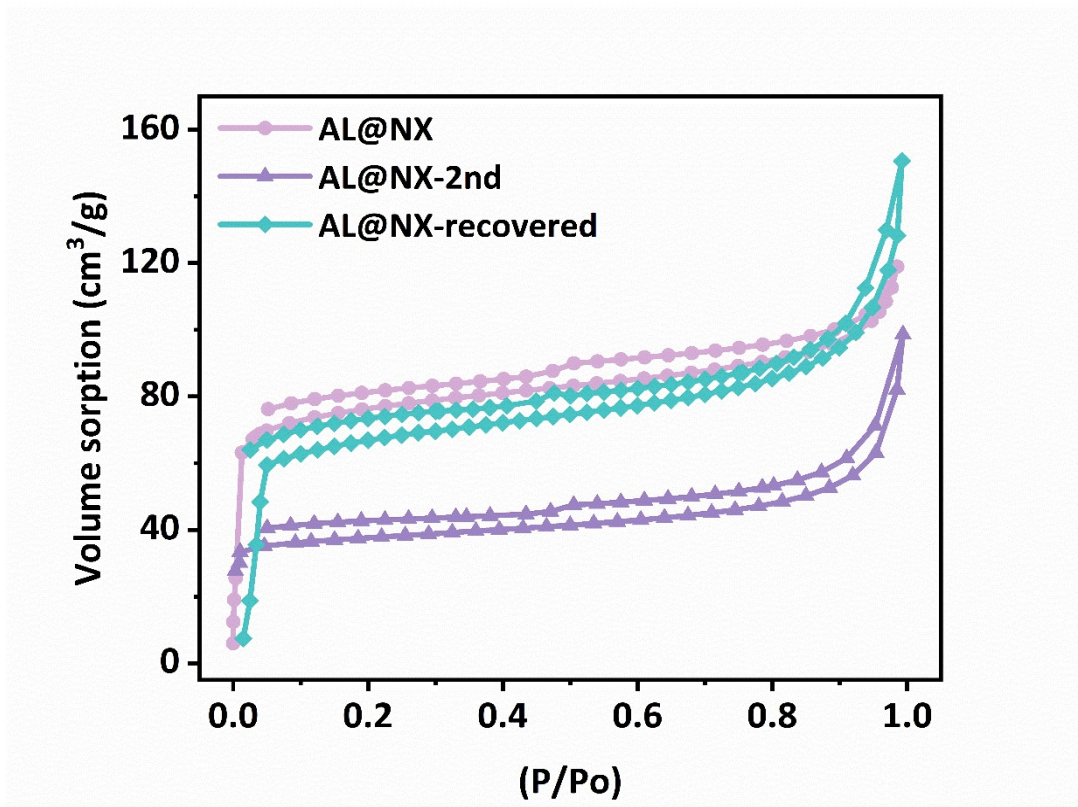

Fig. S5. N<sub>2</sub> adsorption isotherm of fresh, used and recovered AL@NX.

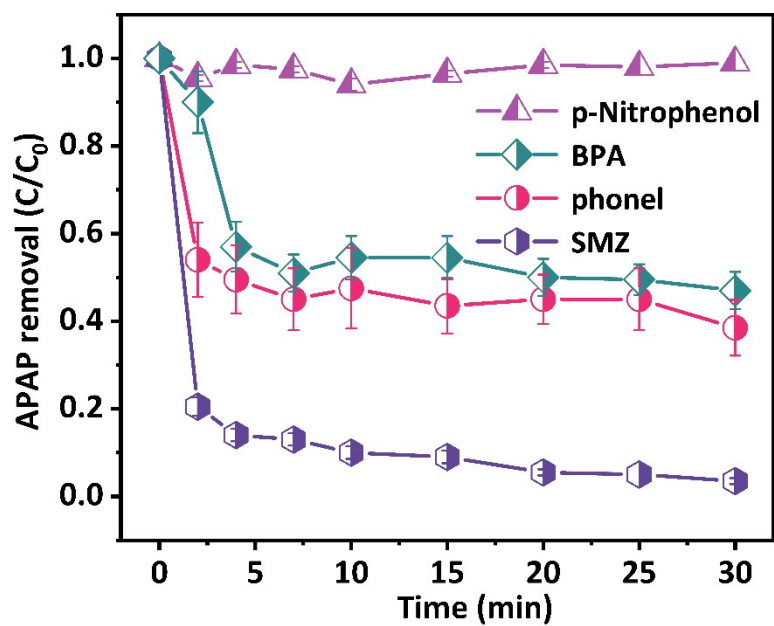

Fig. S6. Degradation experiments on different pollutants. Conditions:  $[\text{catalyst}]_0 = 0.1 \text{ g L}^{-1}$ ,  $[\text{APAP}]_0 = 50 \text{ mg L}^{-1}$ ,  $[\text{PMS}]_0 = 1 \text{ mM}$ , Temperature =  $25 \text{ }^\circ\text{C}$ .

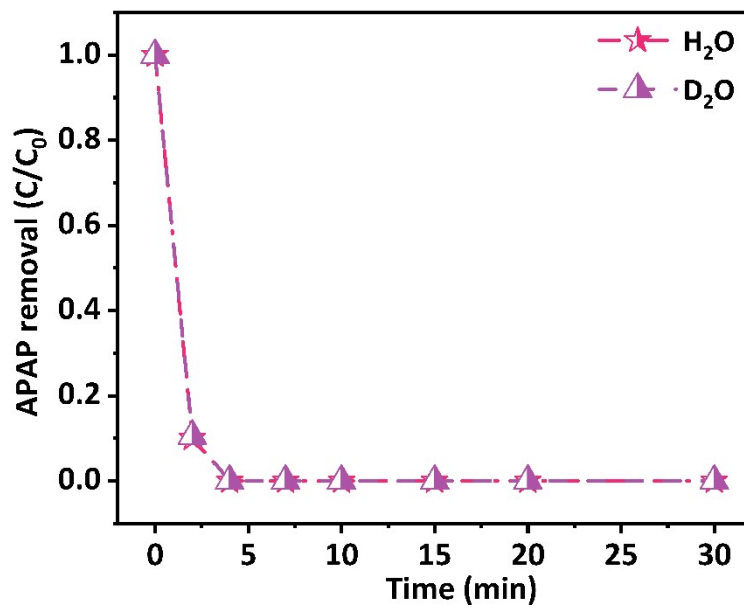

**Fig. S7.** APAP removal performance of AL@NX/PMS system in D<sub>2</sub>O and regular water. Conditions: [catalyst]<sub>0</sub> = 0.1 g L<sup>-1</sup>, [APAP]<sub>0</sub> = 50 mg L<sup>-1</sup>, [PMS]<sub>0</sub> = 1 mM, Temperature = 25 °C.

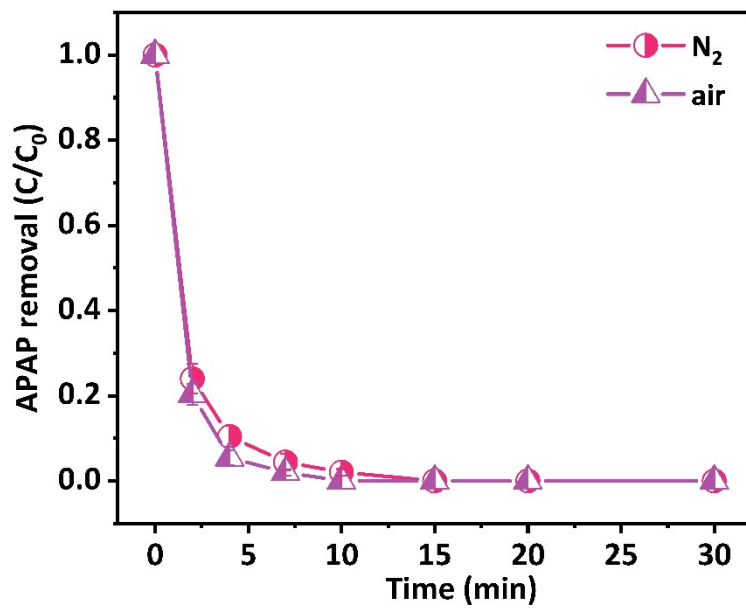

**Fig. S8.** Degradation of APAP in the AL@NX/PMS system under air and N<sub>2</sub>-saturated conditions. Conditions:

[catalyst]<sub>0</sub> = 0.1 g L<sup>-1</sup>, [APAP]<sub>0</sub> = 50 mg L<sup>-1</sup>, [PMS]<sub>0</sub> = 1 mM, Temperature = 25 °C.

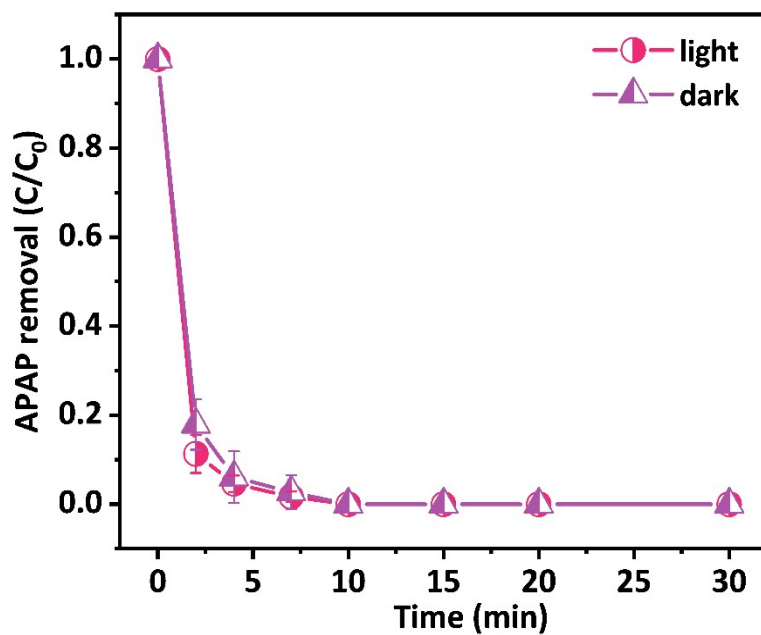

Fig. S9. Degradation of APAP in the AL@NX/PMS system under photoirradiation and dark conditions. Conditions:

[catalyst]<sub>0</sub> = 0.1 g L<sup>-1</sup>, [APAP]<sub>0</sub> = 50 mg L<sup>-1</sup>, [PMS]<sub>0</sub> = 1 mM, Temperature = 25 °C.

124

125

## 126 References

- 127 1. S. Liu, P. Qi, S. Xu, P. Jin, B. Li, W. Yu and B. Young, *Journal of Environmental Chemical Engineering*, 2022,  
 128 **10**.
- 129 2. Y. Shen, M. J. M. d. De Vidales, G. Gorni, A. Gomez-Herrero, F. Fernandez-Martinez and A. J. Dos santos-  
 130 Garcia, *Chemical Engineering Journal*, 2022, **444**.
- 131 3. L. Peng, X. Duan, Y. Shang, B. Gao and X. Xu, *Applied Catalysis B-Environmental*, 2021, **287**.
- 132 4. W. Li, C. Nie, X. Wang, H. Ye, D. Li and Z. Ao, *Separation and Purification Technology*, 2023, **323**.

133
